# Supplementary material
Source: publisher figshare collection journal article supplement (https://tandf.figshare.com/articles/dataset/_/12851405)

## Supplemental Figure 2

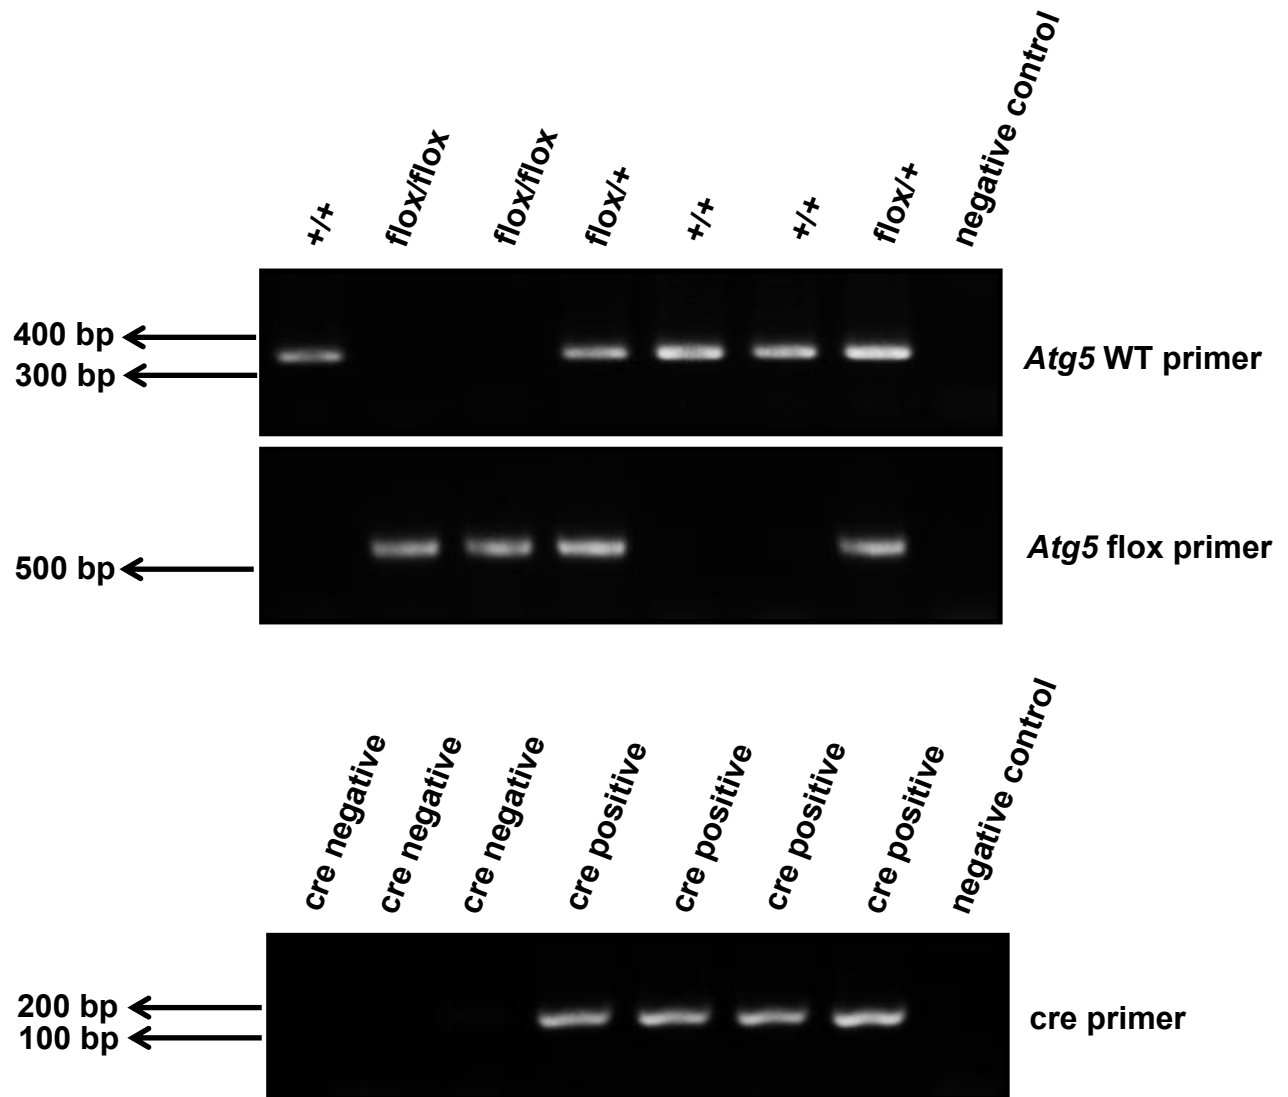

Supplement: Supplementary file 1 [file 1]

## Supplemental Figure 3

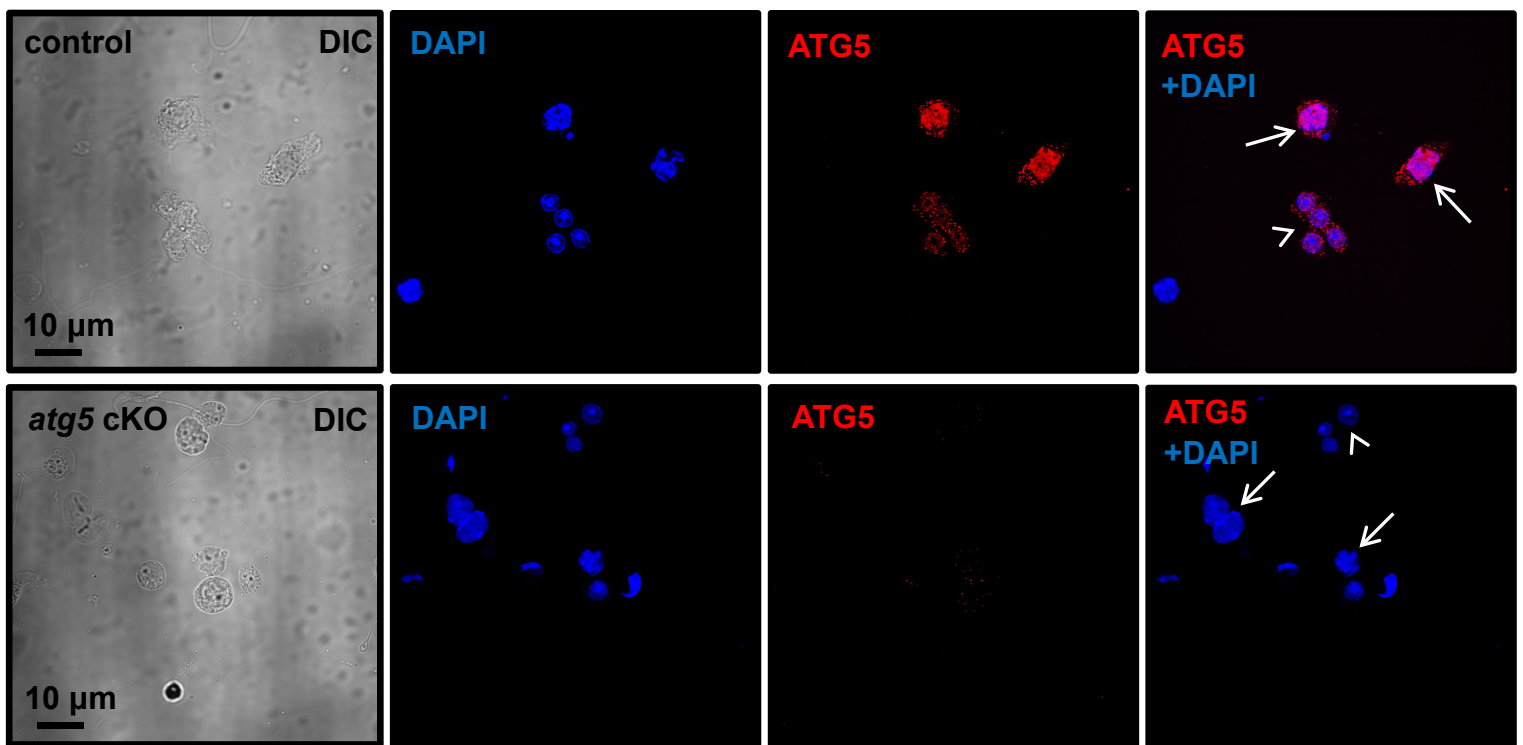

Supplement: Supplementary file 2 [file 1]

## Supplemental Figure 4

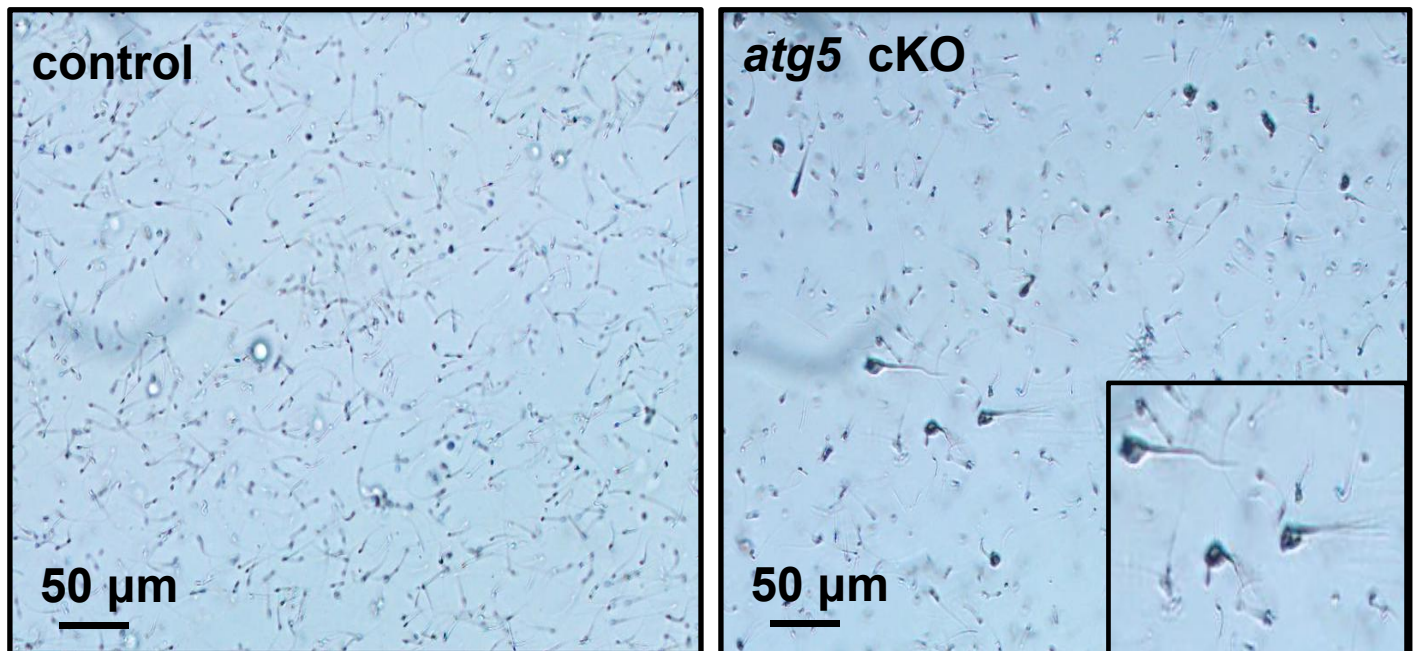

Supplement: Supplementary file 3 [file 1]

# Supplemental Figure 1

A

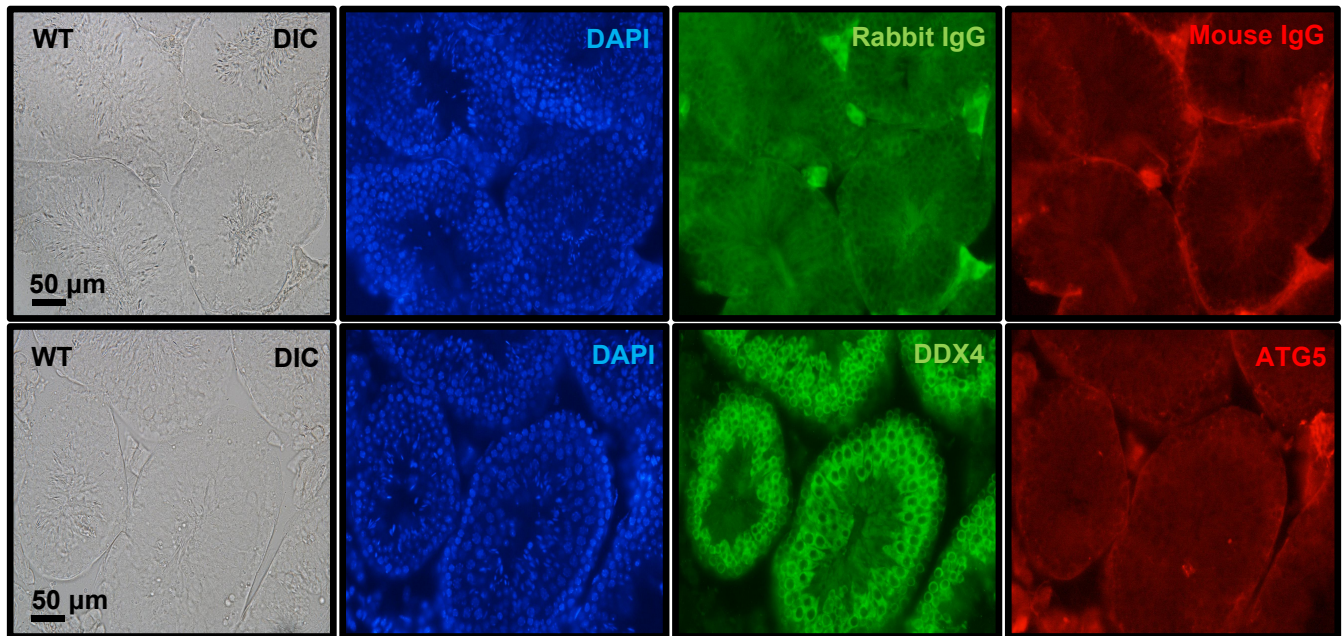

B

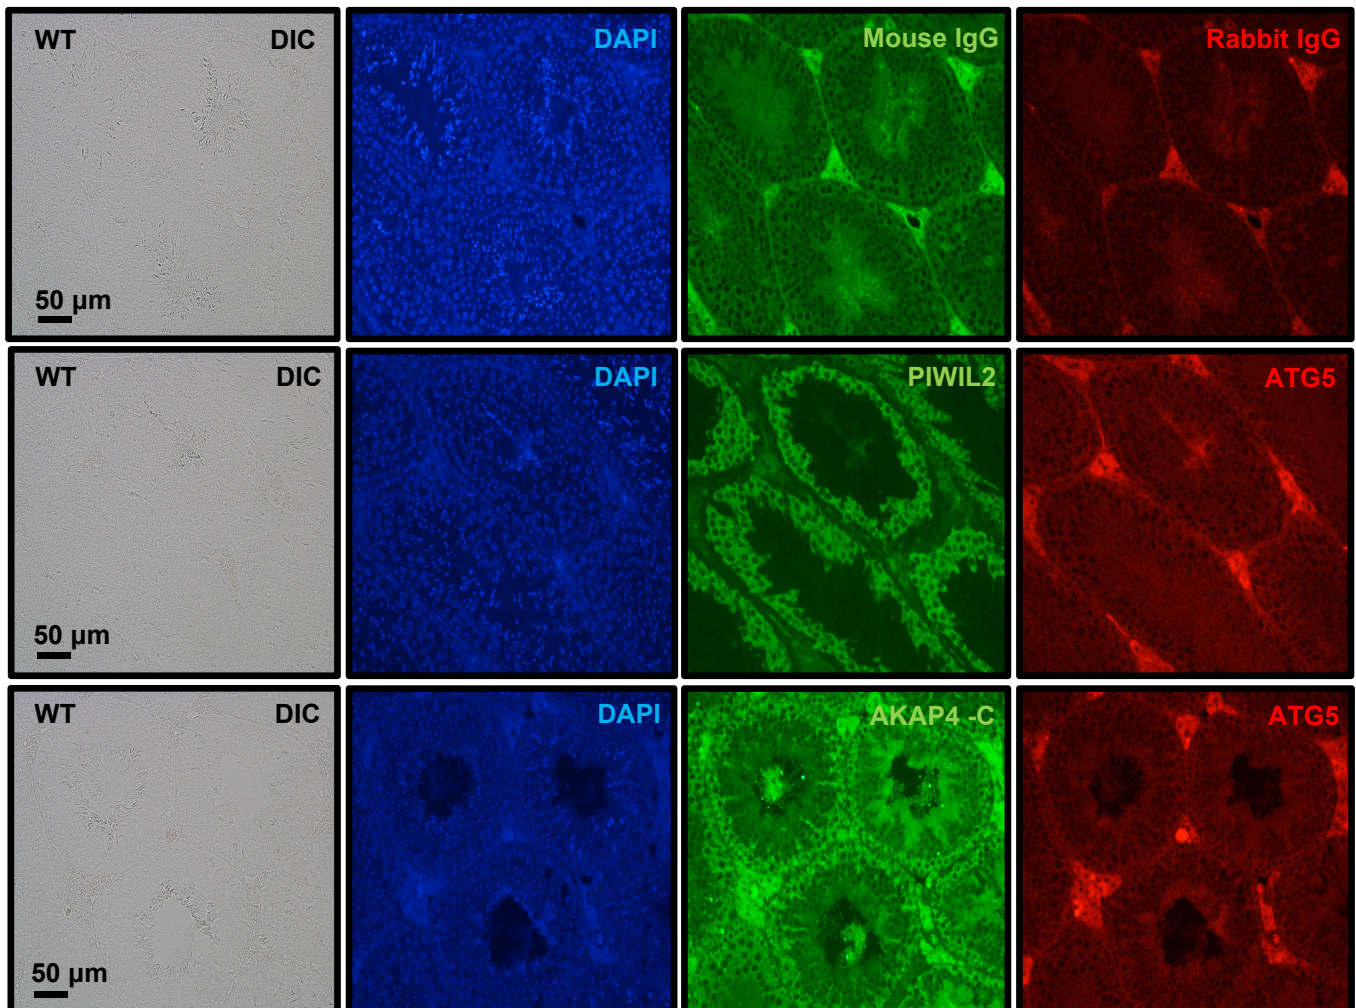

Supplement: Supplementary file 4 [file 1]
